# Supplementary material for: Evolution of SARS-CoV-2 seroprevalence and clusters in school children from June 2020 to April 2021 reflect community transmission: prospective cohort study Ciao Corona
Source: bioRxiv or medRxiv preprint supplement (doi:10.1101/2021.07.19.21260644), 2021-07-19
Supplement: Supplementary file [file media-2.pdf]

**Appendix 4** Detailed information of classes with potential clusters (3 or more newly seropositive children at T3) in schools with 2 or more classes with clusters

| School | School level | N of pupils:<br>T1+/T2+/T3+<br>negative<br>missing* | RT-PCR positive<br>in T2-T3 |       | Quarantine/<br>isolation in T2-T3 |             | Information**<br>(unrelated time points signify >2 weeks<br>interval between all diagnosed or potential<br>infections)                                                                                                                                                            | Possible index cases of<br>individual pupils*** |       |                | Transmission<br>in class<br>plausible<br>**** | Comments                                                                                                                                                              |
|--------|--------------|-----------------------------------------------------|-----------------------------|-------|-----------------------------------|-------------|-----------------------------------------------------------------------------------------------------------------------------------------------------------------------------------------------------------------------------------------------------------------------------------|-------------------------------------------------|-------|----------------|-----------------------------------------------|-----------------------------------------------------------------------------------------------------------------------------------------------------------------------|
|        |              |                                                     | Teacher                     | Child | Teacher                           | Child       |                                                                                                                                                                                                                                                                                   | Teacher                                         | Child | House-<br>hold |                                               |                                                                                                                                                                       |
| 1      | lower        | 1/0/4<br>10<br>3                                    | 0                           | 0     | 0                                 | 3           | 3 pupils in quarantine: n=1 due to PCR+ teacher not related to regular school, n=2 both due to PCR+ household member (HM) of one of the 2 pupils, with whom both had close contact                                                                                                | 0                                               | 0     | 1              | 1                                             |                                                                                                                                                                       |
|        | lower        | 1/0/3<br>5<br>11                                    | 1                           | 0     | 1                                 | 7           | 7 pupils in quarantine: n=5 due to PCR+ HM and n=2 for unknown reasons                                                                                                                                                                                                            | 0                                               | 0     | 1              | 1                                             |                                                                                                                                                                       |
|        | lower        | 0/0/4<br>8<br>8                                     | 0                           | 0     | 0                                 | 4           | 4 pupils in quarantine: n=1 due to PCR+ HM, n=1 due to PCR+ teacher not related to regular school, n=1 due to PCR+ family friend, n=1 for unknown reasons                                                                                                                         | 0                                               | 0     | 1              | 0                                             |                                                                                                                                                                       |
|        | lower        | 1/0/4<br>10<br>3                                    | 0                           | 1     | 1                                 | 4           | 1 pupil in isolation: PCR+ for unknown reasons.<br>3 pupils in quarantine: n=2 each due to PCR+ HM (unrelated time points), n=1 for unknown reason                                                                                                                                | 0                                               | 0     | 1              | 0                                             |                                                                                                                                                                       |
| 2      | lower        | 0/0/4<br>8<br>11                                    | 0                           | 2     | 0                                 | 3           | 2 pupils in isolation: n=1 first in quarantine due to PCR+ HM then PCR+, n=1 PCR+ due to symptoms.<br>2 pupils in quarantine at unrelated time points each due to PCR+ HM                                                                                                         | 0                                               | 0     | 1              | 1                                             | Outbreak in grade 5 class non-participating in this study: 8 pupils PCR+, not clear where Index came from, family of 1 pupil and HM of another pupil were tested PCR+ |
|        | middle       | 0/0/4<br>10<br>6                                    | 0                           | 0     | 0                                 | 1           | 1 pupil in quarantine due to PCR+ HM                                                                                                                                                                                                                                              | 0                                               | 0     | 1              | ?                                             |                                                                                                                                                                       |
|        | middle       | 0/0/3<br>3<br>16                                    | 0                           | 0     | 0                                 | 2           | 2 pupils in quarantine at unrelated time points each due to PCR+ HM                                                                                                                                                                                                               | 0                                               | 0     | 1              | 0                                             |                                                                                                                                                                       |
| 3      | lower        | 0/0/3<br>7<br>9                                     | 1                           | 1     | 1                                 | whole class | Outbreak in a parallel class due to PCR+ child (probably infected by HM; index HM with severe symptoms but not tested). Then teacher and several children PCR+ in this and the parallel classes, the remaining children not tested; both classes (including this one) quarantined | 0                                               | 0     | 1              | 1                                             | Transmission of virus among pupils in the lower school level class probable, primary Index case most probably HM of a child.                                          |

|   |        |                  |   |   |              |              |                                                                                                                                                                                   |   |   |   |   |                                                                                                         |
|---|--------|------------------|---|---|--------------|--------------|-----------------------------------------------------------------------------------------------------------------------------------------------------------------------------------|---|---|---|---|---------------------------------------------------------------------------------------------------------|
|   | middle | 1/1/3<br>12<br>5 | 0 | 0 | 0            | 1            | 1 pupil in quarantine due to travel abroad after fall vacation                                                                                                                    | 0 | 0 | 0 | ? |                                                                                                         |
|   | middle | 1/1/3<br>7<br>8  | 1 | 3 | 1            | 3            | 1 teacher in isolation PCR+, 3 pupils in isolation, each PCR+ due to PCR+ HM (unrelated time points)                                                                              | ? | 0 | 1 | 1 |                                                                                                         |
| 4 | lower  | 1/0/3<br>2<br>15 | 1 | 3 | whole school | whole school | 3 pupils in isolation: n=1 PCR+ for unknown reason; n=1 due to PCR+ HM; n=1 PCR+ with symptoms                                                                                    | 0 | ? | 1 | 1 | School outbreak with the whole school in quarantine                                                     |
|   | middle | 1/1/3<br>7<br>8  | 1 | 7 |              |              | 1 teacher PCR+, 3-6 days later PCR+ pupil tested because of loss of taste. Testing of the whole class 2 days later - 6 further pupils PCR+, none with symptoms, 5 pupils PCR-     | 1 | 0 | 0 | 1 |                                                                                                         |
|   | middle | 0/1/3<br>7<br>12 | 1 | 6 |              |              | 6 pupils in isolation: n=1 in quarantine due to PCR+ HM, then tested PCR+ in the outbreak testing together with 1 teacher and 5 further pupils PCR+                               | ? | ? | 1 | 1 |                                                                                                         |
| 5 | lower  | 1/1/3<br>3<br>13 | 0 | 0 | 0            | 0            | No diagnosed or suspected SARS-CoV-2 infections known                                                                                                                             | ? | ? | ? | ? |                                                                                                         |
|   | middle | 0/0/4<br>6<br>11 | 0 | 0 | 0            | 0            | No diagnosed or suspected SARS-CoV-2 infections known                                                                                                                             | ? | ? | ? | ? |                                                                                                         |
| 6 | middle | 0/0/3<br>13<br>8 | 0 | 8 | 1            | whole class  | First a few children PCR+, then in total 8 PCR+ shortly afterwards. Subsequently class in quarantine, teacher then tested PCR- but later tested seropositive                      | 0 | 1 | ? | 1 |                                                                                                         |
|   | middle | 1/1/3<br>3<br>15 | 0 | 3 | 0            | 3            | 3 pupils in quarantine at unrelated time points each due to PCR+ HM                                                                                                               | 0 | 0 | 1 | 0 |                                                                                                         |
| 7 | upper  | 0/1/3<br>10<br>3 | 0 | 2 | 0            | 2            | 2 pupils in isolation at unrelated time points for unknown reasons                                                                                                                | 0 | ? | ? | 0 | A class not participating in this study in quarantine during Christmas break due to several PCR+ pupils |
|   | upper  | 0/0/3<br>7<br>5  | 0 | 1 | 0            | 1            | 1 pupil in isolation for unknown reasons                                                                                                                                          | 0 | ? | ? | ? |                                                                                                         |
| 8 | lower  | 0/0/3<br>4<br>15 | 0 | 1 | 0            | 1            | 1 pupil in isolation: infected by a teacher not related to the regular school, whole class tested PCR-                                                                            | 0 | 0 | 0 | ? |                                                                                                         |
|   | middle | 1/0/3<br>12<br>8 | 0 | 1 | 0            | 4            | 1 pupil in isolation: infected by a teacher not related to the regular school.<br>3 pupils in quarantine at unrelated time points: n=1 due to PCR+ HM, n=2 of for unknown reasons | 0 | 0 | 1 | 0 |                                                                                                         |
| 9 | middle | 2/0/3<br>8<br>11 | 0 | 1 | 0            | 6            | 1 pupil in isolation: PCR+ during quarantine due to a PCR+ HM.<br>6 pupils in quarantine all due to PCR+ HM                                                                       | 0 | 0 | 1 | 1 | Parallel class not participating in this study in quarantine                                            |

|    |        |                  |   |   |   |   |                                                                                                                                                                     |   |   |   |   |                                             |
|----|--------|------------------|---|---|---|---|---------------------------------------------------------------------------------------------------------------------------------------------------------------------|---|---|---|---|---------------------------------------------|
|    | middle | 0/1/4<br>1<br>18 | 0 | 0 | 0 | 2 | 2 pupils in quarantine at unrelated time points due to PCR+ HM                                                                                                      | 0 | 0 | 1 | 0 | due to infected teacher and class assistant |
| 10 | lower  | 1/0/5<br>9<br>9  | 0 | 0 | 0 | 5 | 1 pupil in isolation due to PCR+ HM.<br>4 pupils in quarantine: n=3 each due to PCR+ HM, n=1 due to PCR+ contact                                                    | 0 | 0 | 1 | 1 |                                             |
|    | lower  | 0/0/3<br>12<br>8 | 0 | 0 | 0 | 3 | 3 pupils in quarantine: n=1 due to PCR+ teacher not related to the regular school, n=2 both due to PCR+ HM of one of the 2 pupils, with whom both had close contact | 0 | 0 | 1 | 1 |                                             |

HM – household member.

\* T1+ denotes the number of seropositive pupils at T1 (June-July 2020); T2+ denotes the number of newly seropositive pupils at round T2 (October-November 2020); T3+ denotes the number of newly seropositive pupils at T3 (March-April 2021); *negative* denotes the number of seronegative pupils at round T3; *missing* denotes previously non-seropositive pupils who were not tested at T3. Total class size can be calculated by the sum of T1+, T2+, T3+, negative, and missing.

\*\* Dates reported denote month and day(s). September to December refer to the year 2020, January to April – to the year 2021.

\*\*\* Possible index cases of individual diagnosed or suspected (RT-PCR+ or quarantined) children in the class.

\*\*\*\* Transmission among pupils/teachers in class was considered possible (1) when the time between RT-PCR diagnoses or quarantine start dates was 2 weeks or below, and not probable (0) if longer. Transmission was defined as unclear (?) if no or only a single child was diagnosed or quarantined in the class according to the interview information.
